# Supplementary material
Source: Springer Nature journal article supplement (https://www.springermedizin.de/resource/supplementary/13054_2014_2469_MOESM2_ESM.pdf/9714164)

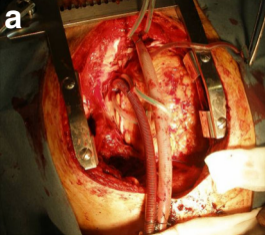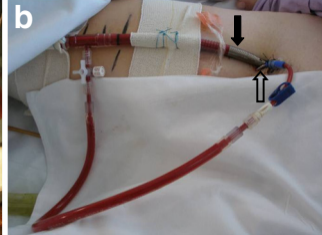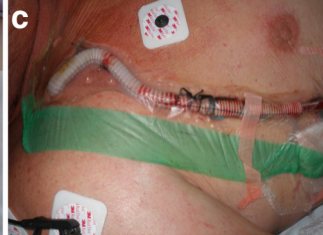

Supplement: MOESM2 [file 9714164]
